# Supplementary material
Source: PubMed Central journal article supplement (PMC3257936)
Supplement: supp_79.11.4382_IAI5608-11_SF1.pdf [file supp_79.11.4382_IAI5608-11_SF1.pdf]

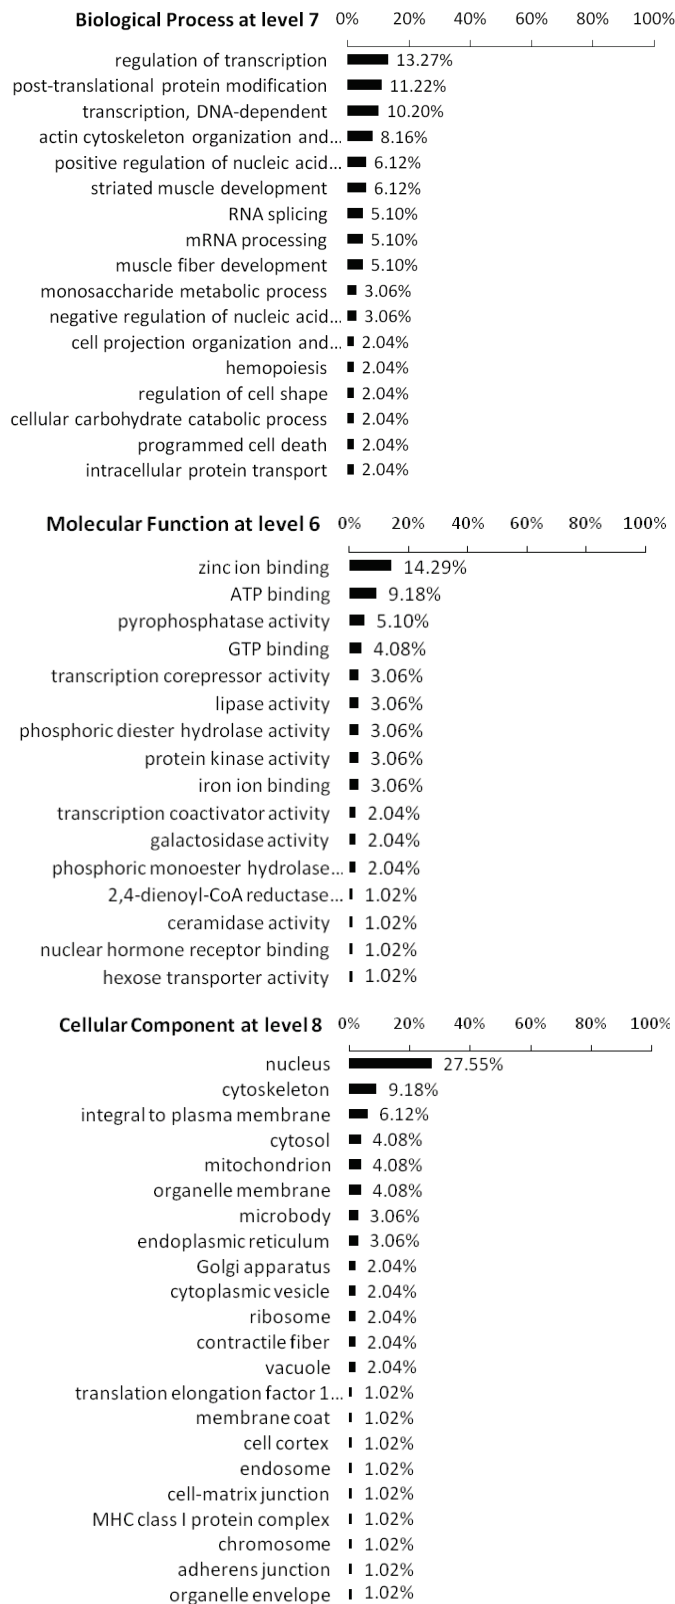

**FIG. S1. Gene ontology analysis of TRP120-interacting proteins identified by Y2H on biological process, molecular function, and cellular component.**
